# Supplementary material for: Understanding offshore high-ozone events during TRACER-AQ 2021 in Houston: Insights from WRF-CAMx photochemical modeling
Source: Copernicus journal article supplement (doi:10.5194/egusphere-2023-1117), 2023-06-16
Supplement: Supplementary file 2 [file egusphere-2023-1117-supplement.pdf]

*Supplement of*

**Understanding offshore high-ozone events during TRACER-AQ 2021 in Houston:  
Insights from WRF-CAMx photochemical modelling**

Wei Li<sup>1</sup>, Yuxuan Wang<sup>1</sup>, Xueying Liu<sup>1</sup>, Ehsan Soleimani<sup>1</sup>, Travis Griggs<sup>1</sup>, James Flynn<sup>1</sup>, and Paul Walter<sup>2</sup>

<sup>1</sup>Department of Earth and Atmospheric Sciences, University of Houston, Houston, 77204, TX, USA

<sup>2</sup>Department of Mathematics, St. Edward's University, Austin, 78704, TX, USA

*Correspondence to:* Yuxuan Wang ([ywang246@central.uh.edu](mailto:ywang246@central.uh.edu))

(a) O<sub>3</sub> concentrations (ppb) using redistributed emissions

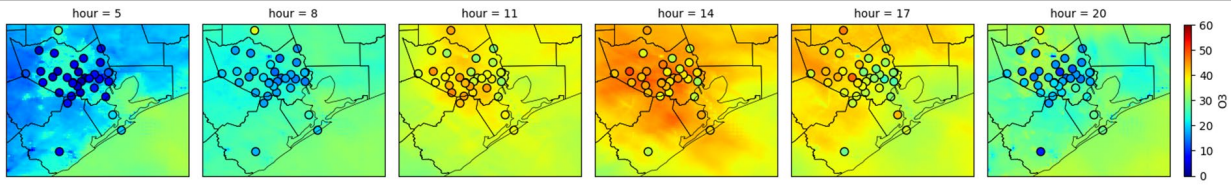

(b) O<sub>3</sub> concentrations (ppb) using CAMx Flexi-nesting option

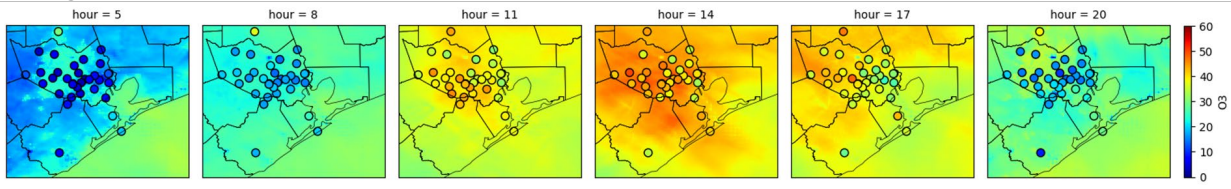

(c) O<sub>3</sub> concentration (ppb) differences (a - b)

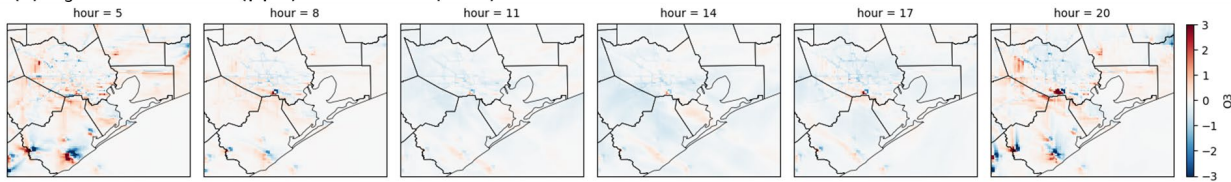

Figure S1. Average O<sub>3</sub> concentrations from August 25-31 in three hour intervals for simulations using redistributed emissions (a) and CAMx Flexi-nesting option (b), and the differences between these two simulations (c). The overlaid dots in a and b show O<sub>3</sub> concentrations at the CAMS sites.

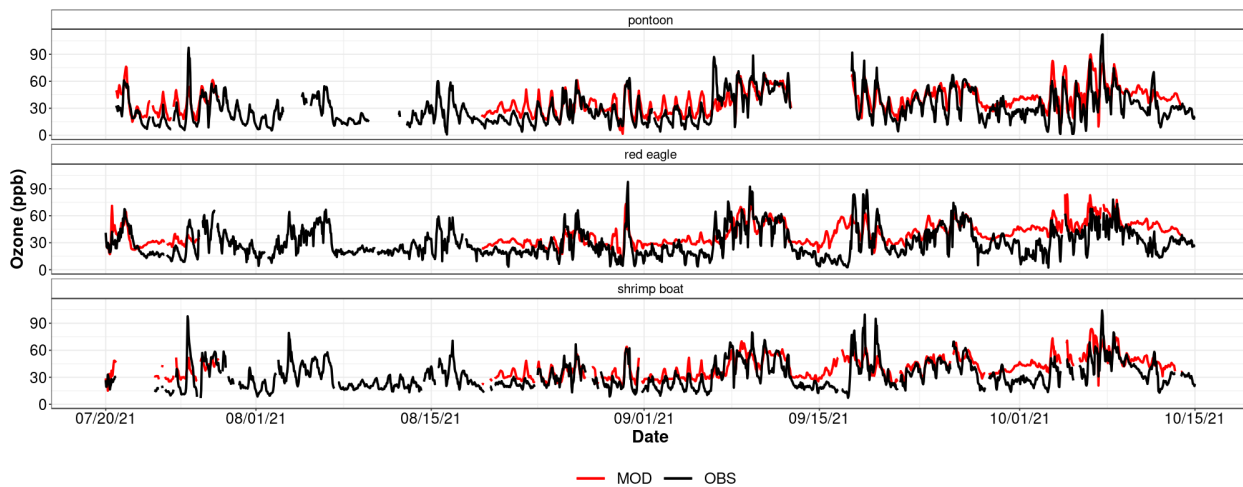

Figure S2. Time series of hourly ozone for observations at three boats (OBS; black line) and simulations (MOD; red line).

Table S1. Hourly ozone evaluation metrics at three boats.

| Boat        | Period        | Observed mean (ppb) | Simulated mean (ppb) | R    | MB (ppb) | NMB (%) | MAE (ppb) | RMSE (ppb) |
|-------------|---------------|---------------------|----------------------|------|----------|---------|-----------|------------|
| pontoon     | all days      | 31.50               | 38.60                | 0.77 | 7.10     | 22.53   | 10.69     | 13.12      |
|             | ozone episode | 43.34               | 45.99                | 0.69 | 2.65     | 6.12    | 10.15     | 13.88      |
|             | clean days    | 25.36               | 34.76                | 0.76 | 9.40     | 37.08   | 10.97     | 12.71      |
| Red Eagle   | all days      | 30.39               | 39.79                | 0.64 | 9.39     | 30.91   | 12.77     | 15.82      |
|             | ozone episode | 44.05               | 47.87                | 0.55 | 3.82     | 8.66    | 11.99     | 15.63      |
|             | clean days    | 24.45               | 36.27                | 0.52 | 11.82    | 48.34   | 13.11     | 15.90      |
| shrimp boat | all days      | 33.43               | 40.81                | 0.71 | 7.36     | 22.04   | 10.68     | 13.32      |
|             | ozone episode | 46.13               | 48.39                | 0.56 | 2.26     | 4.91    | 10.36     | 14.24      |
|             | clean days    | 26.54               | 36.68                | 0.66 | 10.14    | 38.21   | 10.86     | 12.80      |

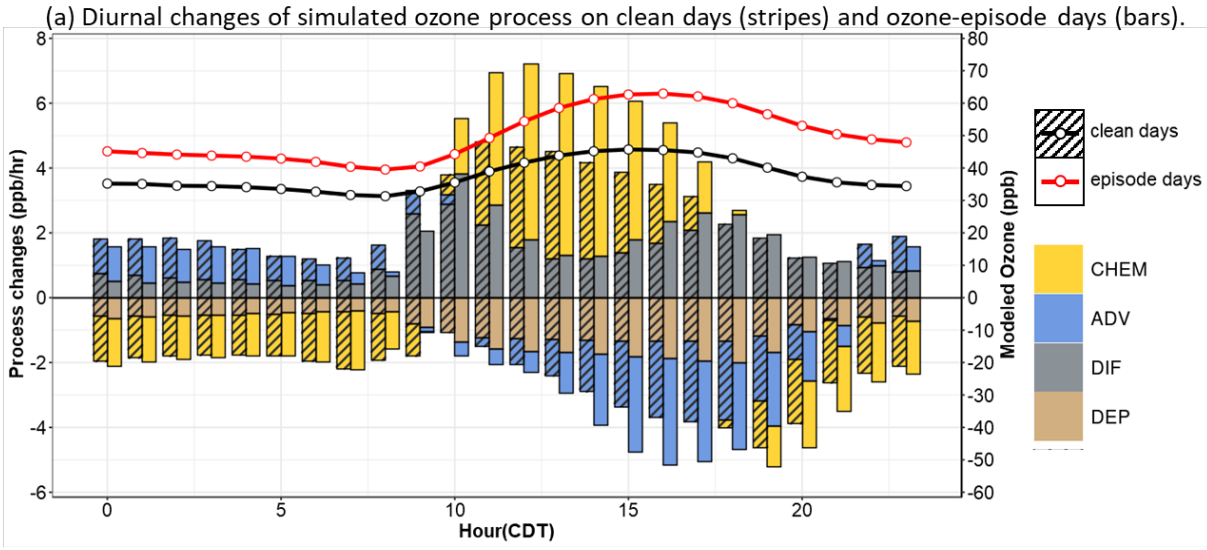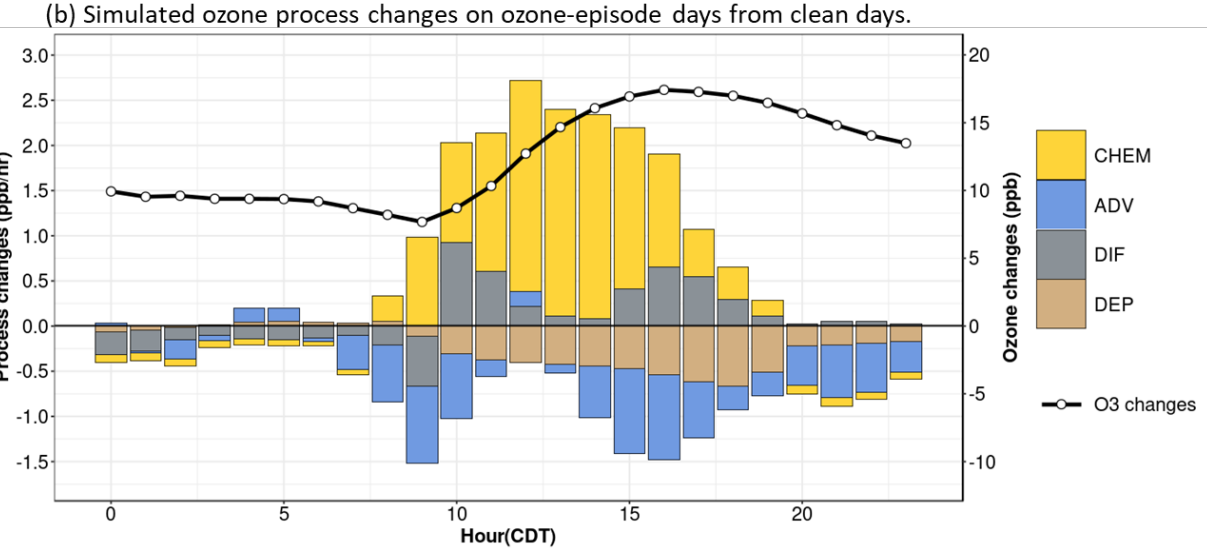

Figure S3. (a) Diurnal changes of simulated ozone processes over the land (black box in Figure 3), including chemistry (CHEM), advection (ADV), diffusion (DIF), and deposition (DEP) on clean days (stripes) and ozone-episode days (bars) integrated across the lowest five model layers. Overlaid lines and points are simulated hourly ozone on clean (black) and ozone-episode (red) days. (b) Process (filled bars) and O<sub>3</sub> (black line) changes during high-O<sub>3</sub> episodes from clean days.

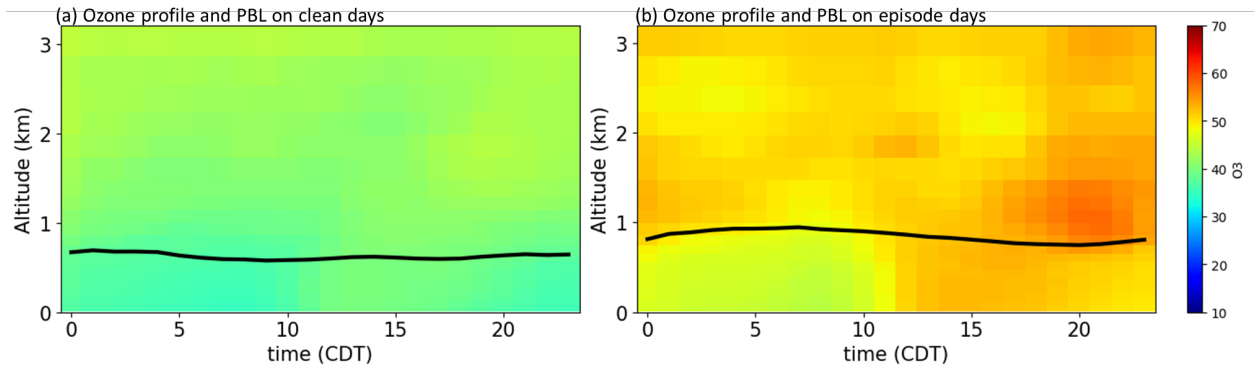

Figure S4. Model simulated diurnal  $O_3$  profiles (background) overlaid with PBL (black lines) averaged over the Gulf of Mexico on clean (a) and episode (b) days.

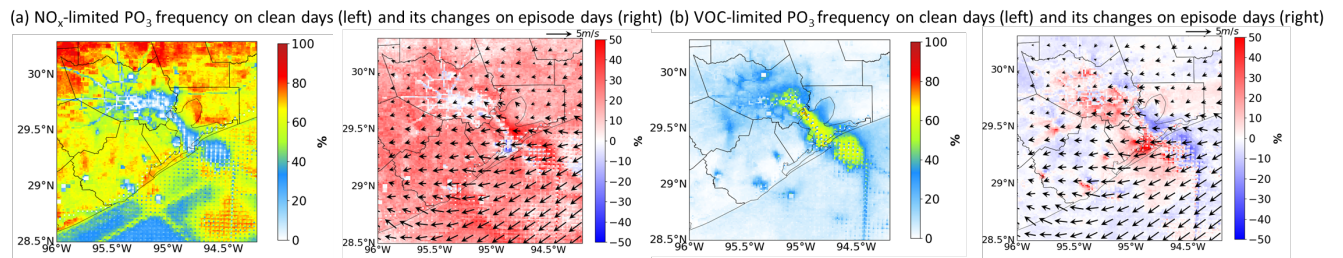

Figure S5. The frequency of ozone production ( $PO_3$ ) rate under  $NO_x$ -limited (a) and VOC-limited (b) regimes on clean days (left) and its changes under episode days (right) during midday (11:00-15:00) hours of the study period.

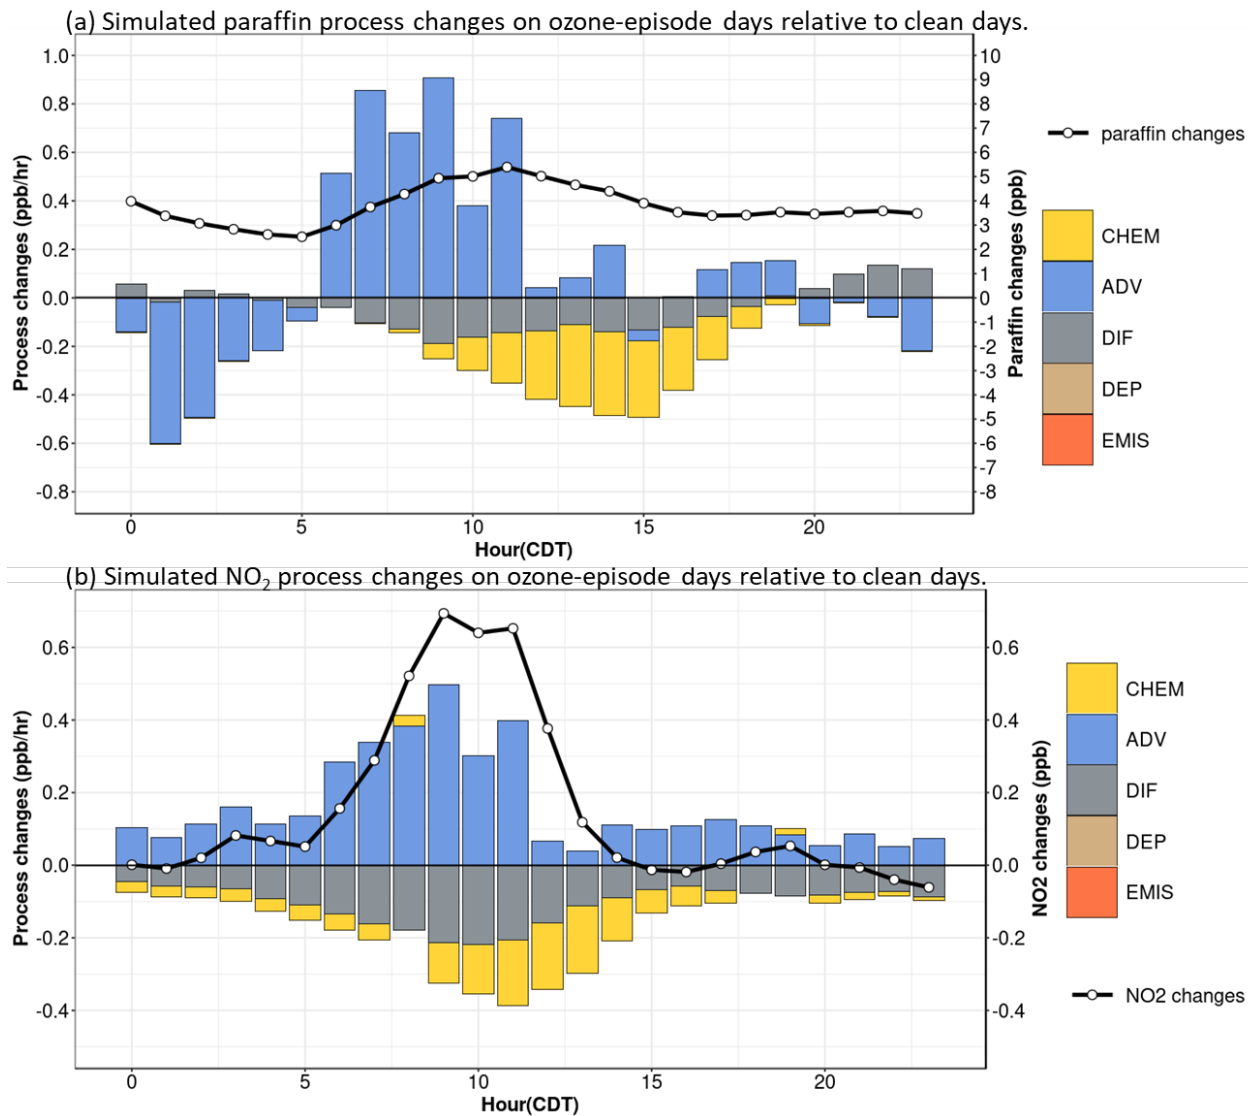

Figure S6. Diurnal changes of simulated processes over the Gulf of Mexico (black box in Figure 2b), including chemistry (CHEM), advection (ADV), diffusion (DIF), deposition (DEP), and emissions (EMIS) on ozone-episode days relative to clean days integrated across the lowest five model layers for paraffin (a) and NO<sub>2</sub> (b). Overlaid lines and points are simulated hourly paraffin (a) and NO<sub>2</sub> (b) changes.

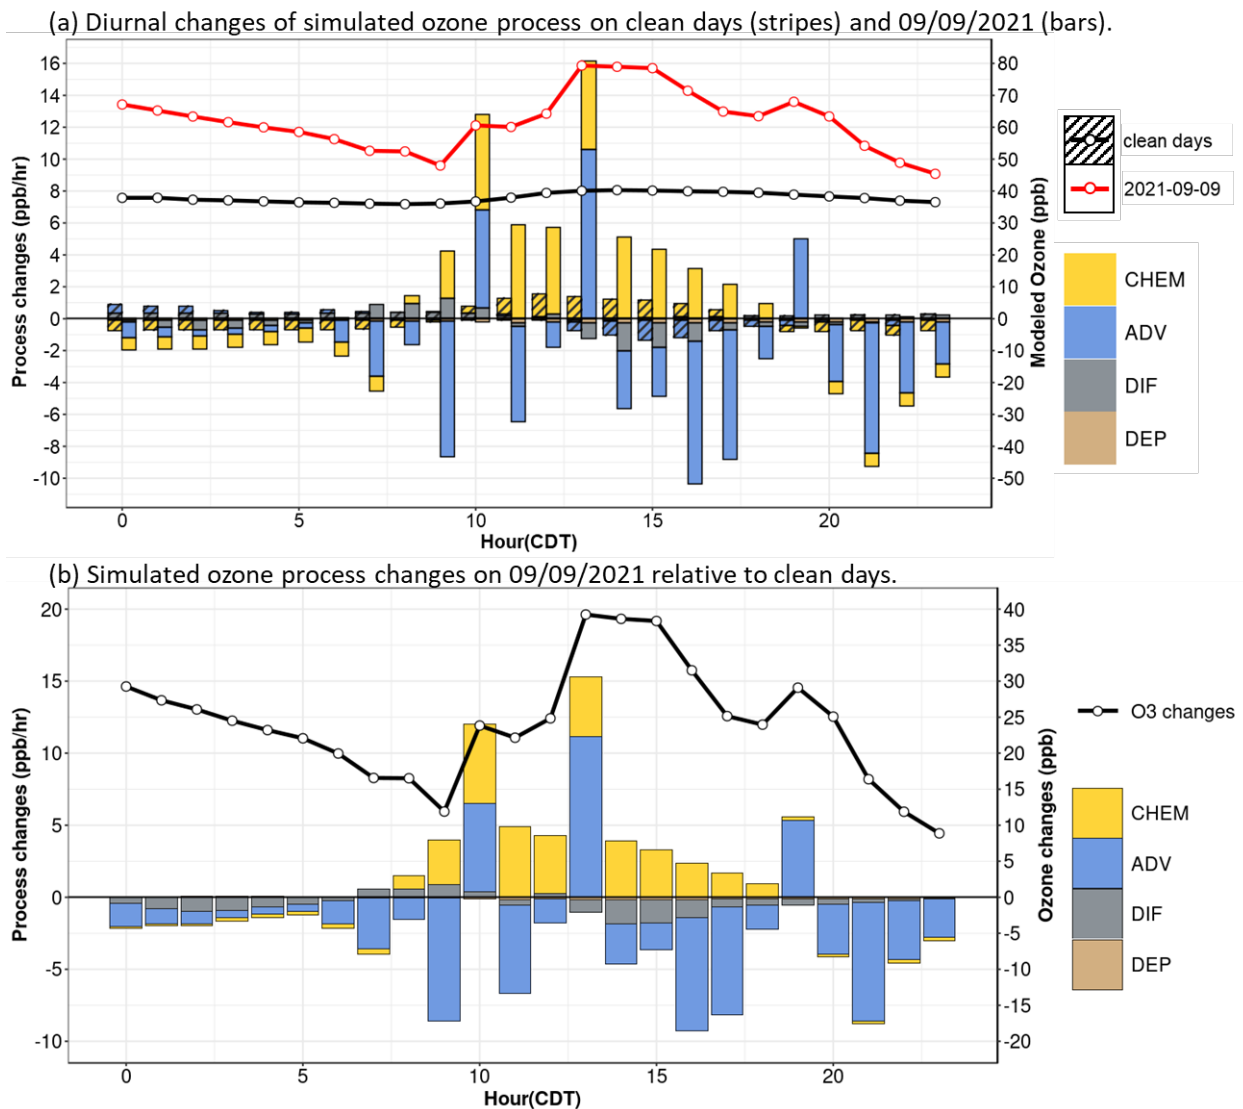

Figure S7. (a) Diurnal changes of simulated ozone processes over the Gulf of Mexico (black box in Figure 2), including chemistry (CHEM), advection (ADV), vertical diffusion (DIF), and deposition (DEP) on clean days (stripes) and 09/09/2021 (bars) integrated across the lowest five model layers. Overlaid lines and points are simulated hourly ozone on clean (black) and 09/09/2021 (red) days. (b) Process (filled bars) and O<sub>3</sub> (black line) changes on 09/09/2021 relative to clean days.

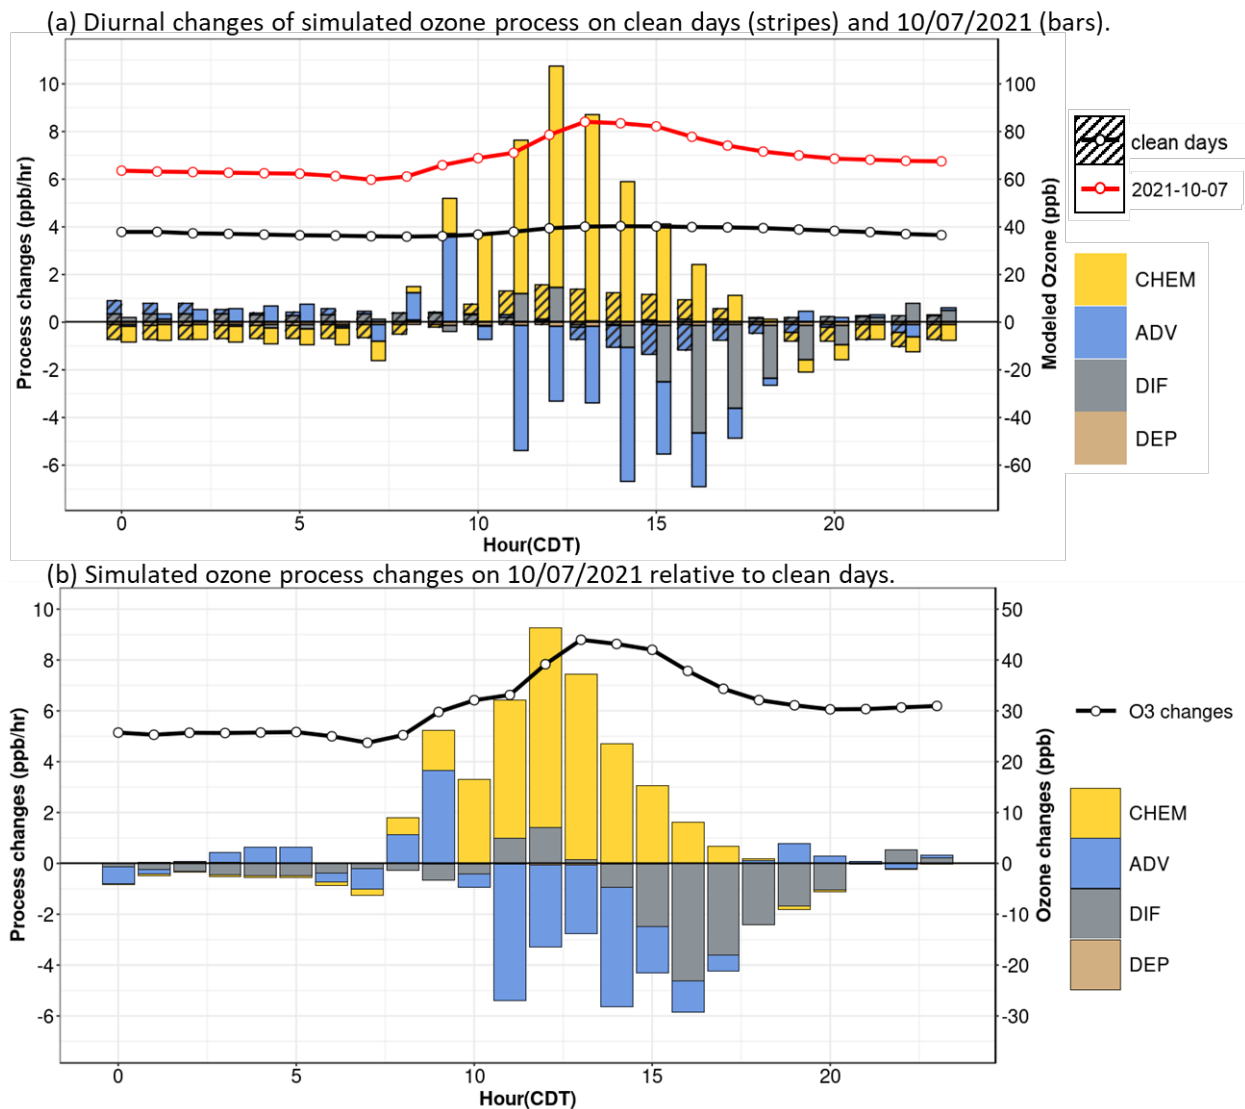

Figure S8. (a) Diurnal changes of simulated ozone processes over the Gulf of Mexico (black box in Figure 2), including chemistry (CHEM), advection (ADV), vertical diffusion (DIF), and deposition (DEP) on clean days (stripes) and 10/07/2021 (bars) integrated across the lowest five model layers. Overlaid lines and points are simulated hourly ozone on clean (black) and 10/07/2021 (red) days. (b) Process (filled bars) and O<sub>3</sub> (black line) changes on 10/07/2021 relative to clean days.
